# Supplementary material for: Drug-guided screening for pancreatic lipase inhibitors in functional foods
Source: Royal Society of Chemistry journal article supplement (doi:10.1039/d0fo03366a), 2021-01-01
Supplement: d0fo03366a1.pdf [file d0fo03366a1.pdf]

## 1 Supplementary Material

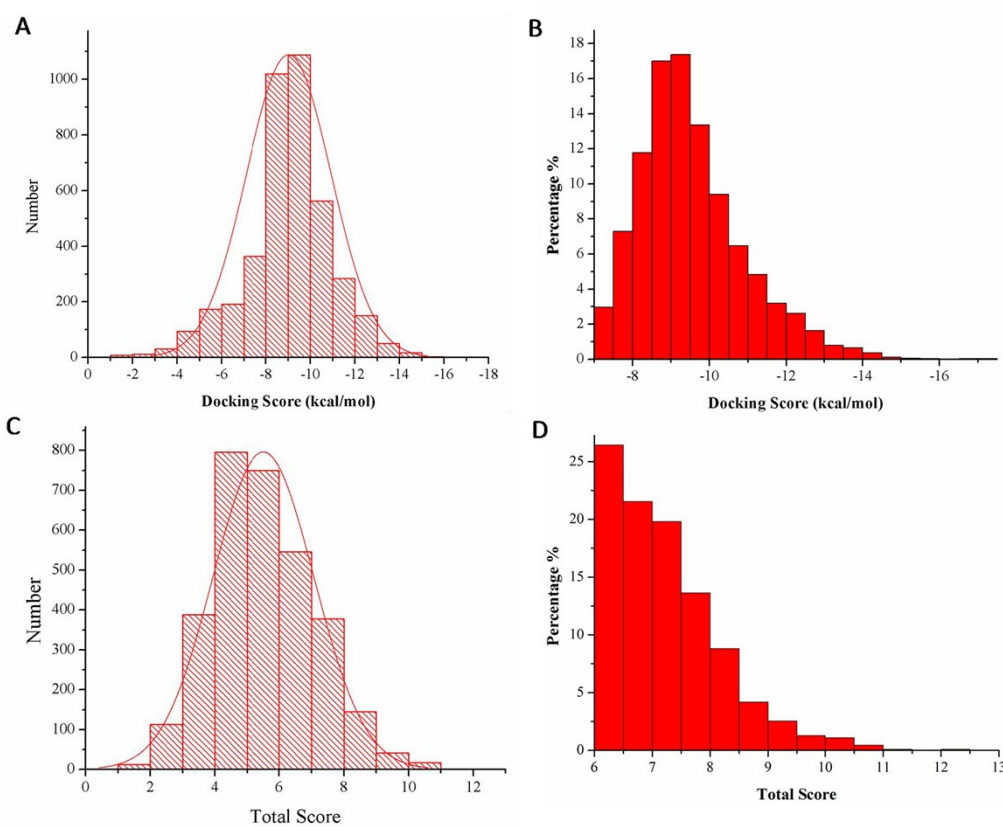

2  
3 Fig.S1 The distribution of scores according to the docking software. A. Results by Glide-XP;  
4 B.Docking Score < -7 kcal/mol by Glide-XP; C. Results by Sybyl-Surflex;D. Total Score > 4 by  
5 Sybyl-Surflex

6

7

8

9

10

11

12

13

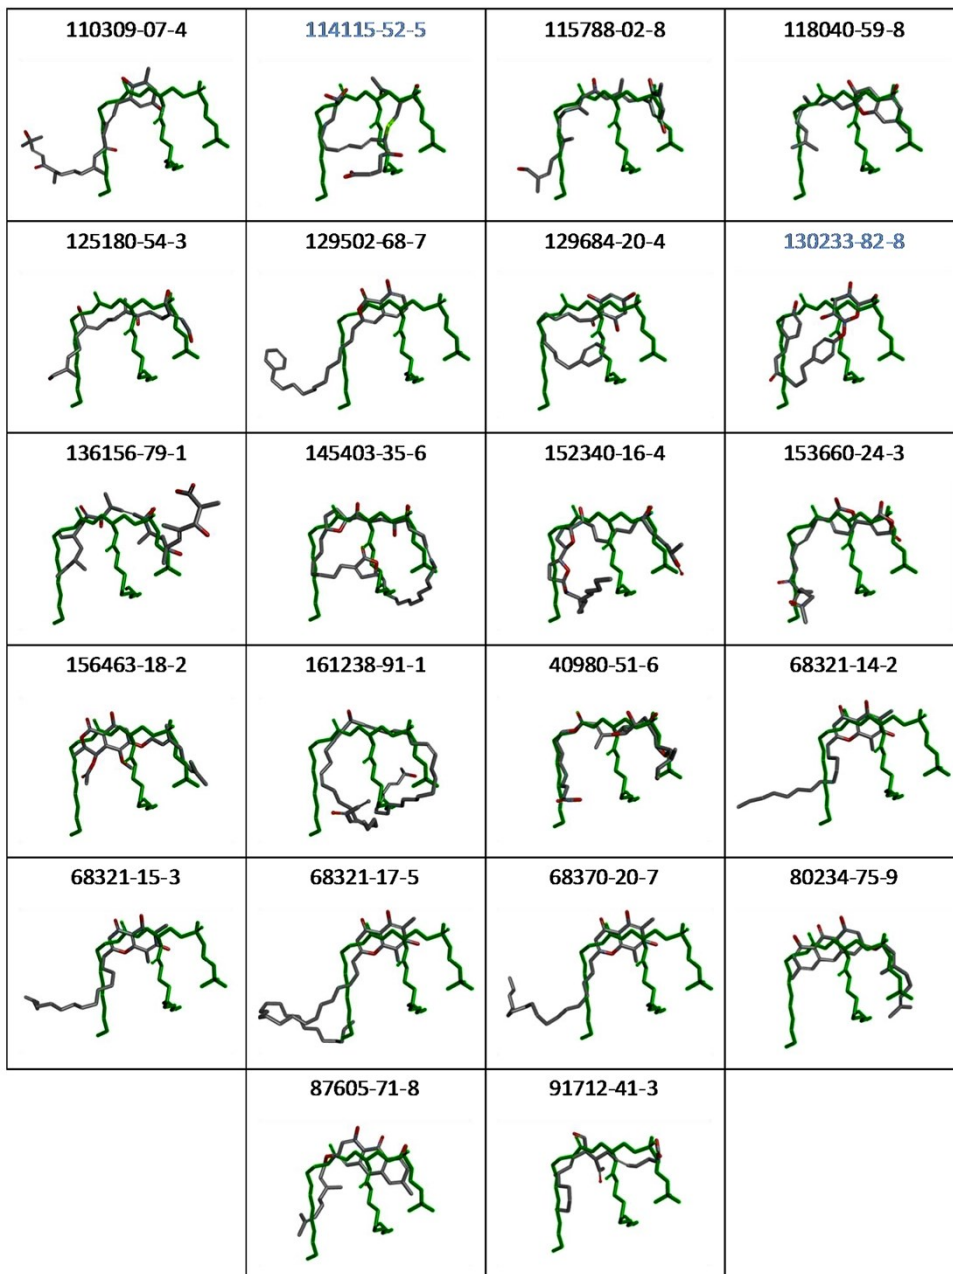

14

15 Fig S2 The position comparison of top hits to the original ligand PLC. (The green one represents

16 the PLC, the forest green ones are those top hits).

17

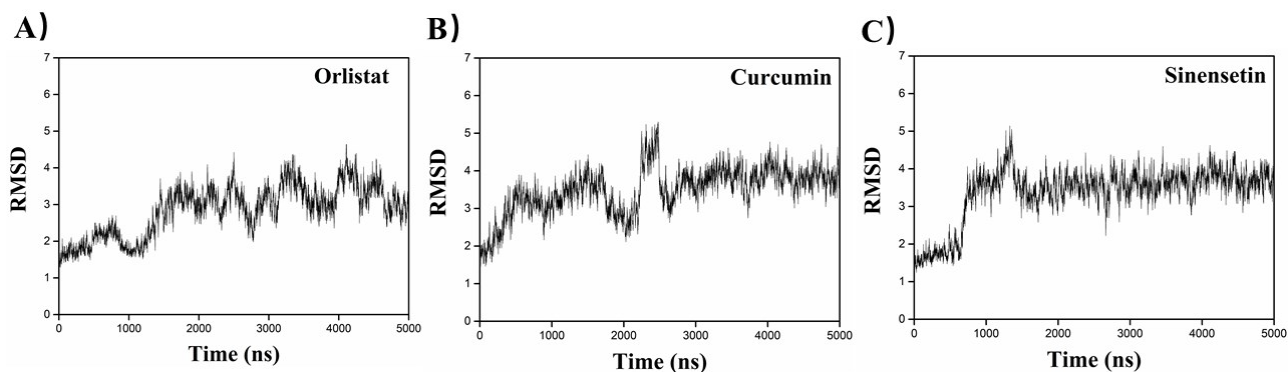

18

19 Fig S3 RMSD of orlistat (A), curcumin (B) and sinensetin (C).

20

21

22

23 Table S1 Docking results of 40 molecules selected by virtual screening from CNPD.

|             | Glide-XP                    |             | Sybyl-Surflex |           |          |            |         |
|-------------|-----------------------------|-------------|---------------|-----------|----------|------------|---------|
|             | Docking-score<br>(kcal/mol) | Total-score | G-score       | PMF-score | D-score  | Chem-score | C-score |
| 136156-79-1 | -13.1353                    | 7.8770      | -352.289      | -97.5616  | -172.273 | -34.5039   | 4       |
| 130233-82-8 | -11.6786                    | 7.3024      | -229.345      | -115.3030 | -141.019 | -36.4753   | 4       |
| 91851-48-8  | -11.0952                    | 6.8822      | -375.566      | -92.1285  | -180.220 | -38.8126   | 3       |
| 99529-30-3  | -11.0243                    | 6.4263      | -281.599      | -66.6293  | -150.021 | -40.3004   | 3       |
| 68321-14-2  | -10.6166                    | 8.3346      | -263.338      | -89.6224  | -134.716 | -39.2833   | 2       |
| 40980-51-6  | -10.5838                    | 10.9569     | -324.877      | -125.8860 | -175.455 | -41.7011   | 4       |
| 68321-17-5  | -10.4488                    | 7.9592      | -258.301      | -94.9902  | -174.307 | -47.5516   | 4       |
| 87605-71-8  | -10.3861                    | 7.6826      | -294.26       | -106.1570 | -162.538 | -48.9586   | 4       |
| 68321-15-3  | -10.3426                    | 7.8066      | -261.491      | -108.1260 | -157.726 | -42.6039   | 4       |

---

|             |          |         |          |           |          |          |   |
|-------------|----------|---------|----------|-----------|----------|----------|---|
| 68370-20-7  | -10.088  | 7.6779  | -250.167 | -69.5592  | -127.215 | -37.0894 | 2 |
| 153660-24-3 | -10.0801 | 7.7583  | -263.205 | -94.3052  | -147.642 | -27.9235 | 3 |
| 144599-01-9 | -9.97607 | 8.0259  | -252.68  | -97.1004  | -143.558 | -37.3679 | 4 |
| 129502-68-7 | -9.86629 | 7.6338  | -248.199 | -84.5675  | -145.388 | -43.5301 | 3 |
| 115788-02-8 | -9.85014 | 9.9850  | -327.577 | -112.3980 | -158.267 | -50.4833 | 4 |
| 122617-02-1 | -9.7982  | 8.6888  | -281.752 | -105.3610 | -141.843 | -40.2707 | 4 |
| 21389-98-0  | -9.71857 | 8.5166  | -267.037 | -75.0768  | -141.238 | -41.2080 | 3 |
| 91712-41-3  | -9.69655 | 8.1441  | -269.506 | -83.9743  | -151.392 | -44.1375 | 3 |
| 111074-75-0 | -9.63016 | 8.2638  | -291.372 | -58.5816  | -150.666 | -42.7266 | 3 |
| 152340-16-4 | -9.62566 | 12.4597 | -291.712 | -98.7407  | -173.500 | -47.1479 | 4 |
| 103538-03-0 | -9.59084 | 7.3111  | -237.756 | -93.0506  | -148.356 | -32.4160 | 3 |
| 118040-59-8 | -9.43361 | 7.4682  | -258.058 | -71.5662  | -133.933 | -38.3473 | 2 |
| 129684-20-4 | -9.31833 | 8.5910  | -292.013 | -102.6060 | -147.334 | -42.7671 | 4 |
| 155661-16-8 | -9.1964  | 7.6442  | -211.135 | -95.6962  | -121.448 | -34.1965 | 3 |
| 153660-25-4 | -9.19495 | 10.1305 | -336.042 | -105.7020 | -153.923 | -41.3133 | 4 |
| 110309-07-4 | -9.10702 | 9.7738  | -284.456 | -89.4377  | -153.744 | -42.3642 | 3 |
| 93822-73-2  | -9.06388 | 8.8099  | -352.509 | -90.0620  | -174.520 | -42.8167 | 3 |
| 80234-75-9  | -8.97052 | 7.1198  | -233.508 | -127.3570 | -147.422 | -46.3742 | 4 |
| 95690-76-9  | -8.94501 | 6.2271  | -243.54  | -76.9609  | -122.814 | -40.9401 | 2 |
| 145403-35-6 | -8.87812 | 10.7901 | -328.827 | -93.0048  | -197.621 | -50.2736 | 3 |
| 119980-00-6 | -8.75798 | 8.3194  | -299.599 | -94.3961  | -159.690 | -50.6864 | 4 |
| 89362-84-5  | -8.71471 | 7.7997  | -272.15  | -82.1696  | -142.925 | -44.1357 | 3 |

---

|             |          |         |          |           |          |          |   |
|-------------|----------|---------|----------|-----------|----------|----------|---|
| 114115-52-5 | -8.66435 | 6.9931  | -263.174 | -101.5610 | -140.254 | -18.6350 | 3 |
| 161238-91-1 | -8.64876 | 11.1503 | -409.482 | -89.7103  | -215.049 | -60.9947 | 3 |
| 125180-54-3 | -8.57326 | 9.0519  | -262.375 | -82.5333  | -156.117 | -42.8845 | 3 |
| 133084-69-2 | -8.56674 | 8.9465  | -221.569 | -85.8384  | -136.595 | -44.0783 | 3 |
| 156463-18-2 | -8.55069 | 6.5795  | -277.979 | -116.1590 | -162.336 | -34.7843 | 4 |
| 88674-93-5  | -8.5121  | 8.7151  | -263.932 | -86.6165  | -133.346 | -40.7347 | 2 |
| 137592-04-2 | -8.21459 | 7.9155  | -258.756 | -96.8473  | -162.676 | -45.7731 | 4 |
| 121254-96-4 | -8.08763 | 10.5372 | -337.841 | -87.3209  | -196.112 | -54.4733 | 3 |
| 62758-06-9  | -8.04284 | 8.2020  | -327.506 | -108.7150 | -173.048 | -41.6204 | 4 |

24 Table S2 Similarity results of 40 molecules selected by virtual screening from CNPD.

|             | TOPDIST | QREGID      | Sim_PLC | Sim_Cetilistat | Sim-Orlistat |
|-------------|---------|-------------|---------|----------------|--------------|
| Orlistat    | 157     | l1pa_ligand | 6.1750  | 5.1580         | 8.2291       |
| 136156-79-1 | 183     | l1pa_ligand | 4.4999  | -              | 4.0026       |
| 130233-82-8 | 175     | orlistat    | 5.0084  | 4.6788         | 4.7906       |
| 91851-48-8  | 184     | l1pa_ligand | 4.8293  | 4.4441         | 4.7431       |
| 99529-30-3  | 182     | l1pa_ligand | 5.1299  | 4.4008         | 5.0874       |
| 68321-14-2  | 142     | cetilistat  | 5.4010  | 6.5849         | 5.9613       |
| 40980-51-6  | 183     | l1pa_ligand | 4.944   | 4.3787         | 4.5298       |
| 68321-17-5  | 151     | cetilistat  | 5.3502  | 6.3348         | 5.8630       |
| 87605-71-8  | 174     | orlistat    | 5.5462  | 5.7555         | 5.4287       |
| 68321-15-3  | 133     | cetilistat  | 5.6410  | 7.2256         | 5.8189       |
| 68370-20-7  | 129     | cetilistat  | 5.4593  | 7.0622         | 5.6146       |

|             |     |             |        |        |        |
|-------------|-----|-------------|--------|--------|--------|
| 153660-24-3 | 181 | l1pa_ligand | 4.9921 | 4.8834 | 4.6379 |
| 144599-01-9 | 173 | l1pa_ligand | 5.5377 | 5.0503 | 5.7080 |
| 129502-68-7 | 139 | cetilistat  | 4.8974 | 6.9266 | 5.5548 |
| 115788-02-8 | 176 | l1pa_ligand | 5.0019 | 4.8074 | 4.7878 |
| 122617-02-1 | 170 | cetilistat  | 5.1092 | 4.8017 | 4.9962 |
| 21389-98-0  | 166 | cetilistat  | 5.0362 | 4.9506 | 4.7677 |
| 91712-41-3  | 150 | l1pa_ligand | 5.1691 | 4.9117 | 5.4074 |
| 111074-75-0 | 172 | cetilistat  | 4.8886 | 5.7676 | 5.8609 |
| 89362-84-5  | 169 | orlistat    | 4.8795 | 4.9695 | 5.0952 |
| 152340-16-4 | 179 | orlistat    | 4.9366 | 4.0829 | 5.0616 |
| 103538-03-0 | 167 | l1pa_ligand | 5.4430 | 5.2391 | 5.2507 |
| 118040-59-8 | 165 | orlistat    | 5.2731 | 5.5041 | 5.5902 |
| 129684-20-4 | 170 | cetilistat  | 5.4842 | 5.9984 | 5.5932 |
| 155661-16-8 | 184 | cetilistat  | 5.2363 | 5.3386 | 5.3058 |
| 153660-25-4 | 175 | cetilistat  | 5.0460 | 4.8918 | 5.1683 |
| 110309-07-4 | 176 | cetilistat  | 5.0842 | 4.2104 | 4.7552 |
| 93822-73-2  | 173 | cetilistat  | 5.5218 | 5.0854 | 5.3417 |
| 80234-75-9  | 182 | orlistat    | 5.3095 | 5.9898 | 5.5499 |
| 95690-76-9  | 144 | cetilistat  | 5.2562 | 7.1645 | 6.2504 |
| 145403-35-6 | 183 | cetilistat  | 5.3819 | 4.0338 | 5.3380 |
| 119980-00-6 | 179 | cetilistat  | 4.4654 | 5.3079 | 4.8156 |
| 89362-84-5  | 169 | orlistat    | 4.8795 | 4.9695 | 5.0952 |

|             |     |             |        |        |        |
|-------------|-----|-------------|--------|--------|--------|
| 114115-52-5 | 176 | 1lpa_ligand | 5.0513 | -      | 4.2279 |
| 161238-91-1 | 182 | cetilistat  | 4.6886 | 4.3915 | 5.3642 |
| 125180-54-3 | 179 | 1lpa_ligand | 4.7550 | 4.0991 | 4.2911 |
| 133084-69-2 | 166 | cetilistat  | 4.9117 | 6.4215 | 5.7741 |
| 156463-18-2 | 181 | orlistat    | 5.3683 | 5.0862 | 5.4158 |
| 88674-93-5  | 178 | 1lpa_ligand | 4.5677 | 5.0516 | 5.0802 |
| 137592-04-2 | 168 | cetilistat  | 6.1549 | 5.5828 | 5.8507 |
| 121254-96-4 | 184 | cetilistat  | 5.2539 | 4.2244 | 4.4345 |
| 62758-06-9  | 156 | orlistat    | 5.0514 | -      | 5.5259 |

---

25

26

27

28

29

30

31

32

33

34

35

36

37

38  
39  
40  
41  
42  
43  
44  
45  
46

47 Table S3 Interaction analyses between selected molecules from CNPD with pancreatic lipase by  
48 Glide.

| Glide       | Ser152 | Phe77 | Leu153 | Other Hydrogen bonding     | Hydrophobic interaction                            |
|-------------|--------|-------|--------|----------------------------|----------------------------------------------------|
| 136156-79-1 | Y      | Y     | N      | Arg256<br>Arg111Lys80Asp79 | Ile78 Phe215 Phe77                                 |
| 130233-82-8 | Y      | N     | N      | Arg256 Asp79               | Phe215Phe77 Tyr114                                 |
| 91851-48-8  | N      | N     | N      | Arg256                     | Ala259 Phe77 Phe215 Ile78 Tyr114<br>Pro180         |
| 99529-30-3  | N      | N     | N      | Arg256 Asp79 Glu179        | Phe215 Ile209 Phe77 Pro180 Ala260<br>Ile78 Tyr114  |
| 68321-14-2  | Y      | Y     | Y      | -                          | Tyr114 Pro180 Phe77 His263 Cys181<br>Phe215 Thr115 |
| 40980-51-6  | Y      | Y     | N      | Arg256 Asp79 Tyr114        | Phe77 Phe215 Tyr114                                |



---

|             |   |   |   |                               |                                             |
|-------------|---|---|---|-------------------------------|---------------------------------------------|
| 68321-17-5  | Y | Y | Y | -                             | Phe77 His263 Phe215 Tyr114                  |
| 87605-71-8  | Y | N | N | His263 Arg256 Asp79           | Phe77 His263 Tyr114                         |
| 68321-15-3  | Y | Y | Y | -                             | Phe77 His263 Phe215 Tyr114                  |
| 68370-20-7  | Y | Y | Y | -                             | Tyr114 Phe215 Phe77 Pro180 Cys181<br>His263 |
| 153660-24-3 | N | Y | N | Tyr114 Arg256 Asp79           | Tyr114 Phe215 Phe77                         |
| 144599-01-9 | N | N | N | Arg256 Asp79                  | Ala260 Phe215 His263                        |
| 129502-68-7 | Y | Y | N | -                             | His263 Tyr114 Phe215                        |
| 115788-02-8 | Y | N | N | His263 Arg256 Asp79           | Phe215 Tyr114                               |
| 122617-02-1 | N | N | N | His263 Asp79 Arg256<br>Phe215 | Phe215 Leu264 Ile209 Tyr114 Pro118          |
| 21389-98-0  | N | N | N | Phe215 Asp79                  | His263 Phe77 Pro180                         |
| 91712-41-3  | Y | Y | N | Phe215 Arg256                 | Phe77 Phe215 Tyr114                         |
| 111074-75-0 | N | N | N | Asp79 Arg256                  | His263 Phe77 Ile209                         |
| 152340-16-4 | Y | N | N | His263 Asp79 Arg256           | Tyr114 Phe215 His263                        |
| 103538-03-0 | N | N | N | Arg256 Asp79                  | Pro180 His263 Tyr114                        |
| 118040-59-8 | N | Y | N | Asp79 Arg256                  | Pro80 Phe77 Phe215 Tyr114 His263            |
| 129684-20-4 | N | Y | N | Asp79 Arg256                  | Pro180 Tyr114 Phe77                         |
| 155661-16-8 | N | N | N | Asp79 Arg256                  | Thr114 Phe215 Ser152                        |
| 153660-25-4 | N | N | N | Asp79 Arg256 Tyr114           | Tyr114 Phe215 Phe77                         |
| 110309-07-4 | Y | Y | N | Cys181 Gln183                 | Tyr114 His263 Ile209                        |
| 93822-73-2  | N | N | N | Asp79 Arg256                  | Phe215 His263                               |
| 80234-75-9  | Y | N | Y | -                             | Phe215 Thr255 Ala259                        |

---

---

|             |   |   |   |                      |                                   |
|-------------|---|---|---|----------------------|-----------------------------------|
|             |   |   |   | Phe215 Tyr114 Arg256 | Ala259 His263 Ala260 Phe215 Phe77 |
| 95690-76-9  | N | N | N | Asp79                | Tyr114                            |
| 145403-35-6 | N | Y | N | Arg256               | Phe215 Tyr114 His253              |
| 119980-00-6 | N | N | N | Arg256 Asp79         | Phe77 Tyr114 Ala260               |
| 89362-84-5  | N | N | N | Arg256 Asp79         | Phe215 Tyr114 Ala259              |
| 114115-52-5 | Y | N | N | His163 Arg256        | Ile78 Phe215                      |
| 161238-91-1 | N | Y | N | Phe258               | Phe77 Ala259                      |
| 125180-54-3 | Y | N | N | Asp79 Arg256         | His263 Phe215 Tyr114              |
| 133084-69-2 | N | N | N | Asp79                | Phe77 His263 Tyr114               |
| 156463-18-2 | Y | Y | Y | -                    | Ile78                             |
| 88674-93-5  | N | N | N | Asp79 Arg256 Tyr114  | His263 Phe215 Phe77 Tyr114        |
| 137592-04-2 | N | N | N | Arg256               | Phe215 Phe258 Thr255              |
| 121254-96-4 | N | N | N | Asp205               | Phe77 His263 Tyr114               |
| 62758-06-9  | N | N | N | Arg256               | Tyr114 Phe77 Phe215               |

---

49 The blue ones are inappropriate and should be deleted.

50

51

52

53

54

55

56

57

58  
59  
60  
61  
62  
63  
64  
65  
66

67 Table S4 The information of screened molecules from CNPD.

|                                                                                                                                                                                   |                                                                                                                                                                                                                                |                                                                                                                                                                                 |
|-----------------------------------------------------------------------------------------------------------------------------------------------------------------------------------|--------------------------------------------------------------------------------------------------------------------------------------------------------------------------------------------------------------------------------|---------------------------------------------------------------------------------------------------------------------------------------------------------------------------------|
| <p>40980-51-6</p> <p>PseudomonicAcidB;<br/><i>Pseudomonas</i>;<br/>Commercially available</p> 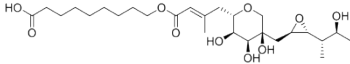 | <p>87605-71-8</p> <p>3-geranyloxyemodin-6-methyl-1,8-dihydroxyanthrone;<br/><i>Psorospermum febrifugum</i>;<br/>Commercially available</p>  | <p>91712-41-3</p> <p>levuglandin E;<br/>Chemical synthesis;<br/>Commercially available</p>  |
| <p>118040-59-8</p> <p>Kiwinin;<br/><i>Mushroom</i>;<br/>No commercial source</p>                                                                                                  | <p>145403-35-6</p> <p>Gigantrionenin;<br/><i>Tomato branch</i>;<br/>No commercial source</p>                                                                                                                                   | <p>152340-16-4</p> <p>Bullacin;<br/><i>Tomato branch</i>;<br/>No commercial source</p>                                                                                          |

|                                                                                                                                                                                            |                                                                                                                                                                                           |                                                                                                                                                                                                      |
|--------------------------------------------------------------------------------------------------------------------------------------------------------------------------------------------|-------------------------------------------------------------------------------------------------------------------------------------------------------------------------------------------|------------------------------------------------------------------------------------------------------------------------------------------------------------------------------------------------------|
| 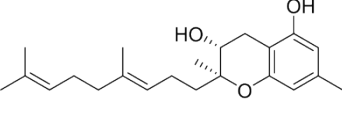                                                                                                          |                                                                                                          |                                                                                                                    |
| <p>68321-14-2</p> <p>No common name;</p> <p><i>Sophora flavescens</i>;</p> <p>No commercial source</p>    | <p>68321-15-3</p> <p>No common name;</p> <p><i>Sophora flavescens</i>;</p> <p>No commercial source</p>  | <p>68321-17-5</p> <p>No common name;</p> <p><i>Sophora flavescens</i>;</p> <p>No commercial source</p>            |
| <p>68370-20-7</p> <p>No common name;</p> <p><i>Sophora flavescens</i>;</p> <p>No commercial source</p>  | <p>156463-18-2</p> <p>No common name;</p> <p>Plants;</p> <p>No commercial source</p>                   | <p>129502-68-7</p> <p>8-hydroxy-3-(12-phenyldodecyl)isocoumarin;</p> <p>Plants;</p> <p>No commercial source</p>  |

|                                                                                                                                                                                             |                                                                                                                                                                                                   |                                                                                                                                                                                      |
|---------------------------------------------------------------------------------------------------------------------------------------------------------------------------------------------|---------------------------------------------------------------------------------------------------------------------------------------------------------------------------------------------------|--------------------------------------------------------------------------------------------------------------------------------------------------------------------------------------|
| <p>125180-54-3</p> <p>No common name;</p> <p>Plants;</p> <p>No commercial source</p> 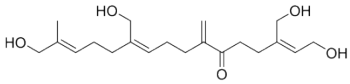                      | <p>80234-75-9</p> <p>3-geranyloxy-6-methyl-1,8-dihydroxyanthrone;</p> <p>Shrub;</p> <p>No commercial source</p>  | <p>136156-79-1</p> <p>cubensis acid;</p> <p><i>Fungus</i>;</p> <p>No commercial source</p>         |
| <p>153660-24-3</p> <p>Fasciospongides B;</p> <p><i>Phylum Porifera</i>;</p> <p>No commercial source</p>  | <p>161238-91-1</p> <p>Petroformyne-1;</p> <p><i>Phylum Porifera</i>;</p> <p>No commercial source</p>           | <p>115788-02-8</p> <p>No common name;</p> <p><i>Phaeophyta</i>;</p> <p>No commercial source</p>  |
| <p>110309-07-4</p> <p>No relevant information found</p>                                                  | <p>129684-20-4</p> <p>No relevant information found</p>                                                        |                                                                                                                                                                                      |
